# Supplementary material for: A low-cost monitor for simultaneous measurement of fine particulate matter and aerosol optical depth – Part 3: Automation and design improvements
Source: Copernicus journal article supplement (doi:10.5194/amt-14-6023-2021), 2021-09-15
Supplement: Supplementary file 1 [file amt-14-6023-2021-supplement.zip]

Archive with 3 entries (3 files):
- Supplement File S2.pdf
- amt-14-6023-2021-supplement-title-page.pdf
- Supplement File S1.pdf
