# Supplementary material for: A low-cost monitor for simultaneous measurement of fine particulate matter and aerosol optical depth – Part 3: Automation and design improvements
Source: Copernicus journal article supplement (doi:10.5194/amt-14-6023-2021), 2021-09-15
Supplement: Supplementary file 1 [file amt-14-6023-2021-supplement.zip › amt-14-6023-2021-supplement-title-page.pdf]

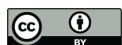

*Supplement of*

**A low-cost monitor for simultaneous measurement of fine particulate matter and aerosol optical depth – Part 3: Automation and design improvements**

**Eric A. Wendt et al.**

*Correspondence to:* John Volckens ([john.volckens@colostate.edu](mailto:john.volckens@colostate.edu))

- [amt-14-6023-2021-supplement-title-page.pdf](#)
- [Supplement File S1.pdf](#)
- [Supplement File S2.pdf](#)

The copyright of individual parts of the supplement might differ from the article licence.
